# Supplementary material for: Diversity and structure of PIF/Harbinger-like elements in the genome of Medicago truncatula
Source: Springer Nature journal article supplement (doi:10.1186/1471-2164-8-409), 2007-01-01

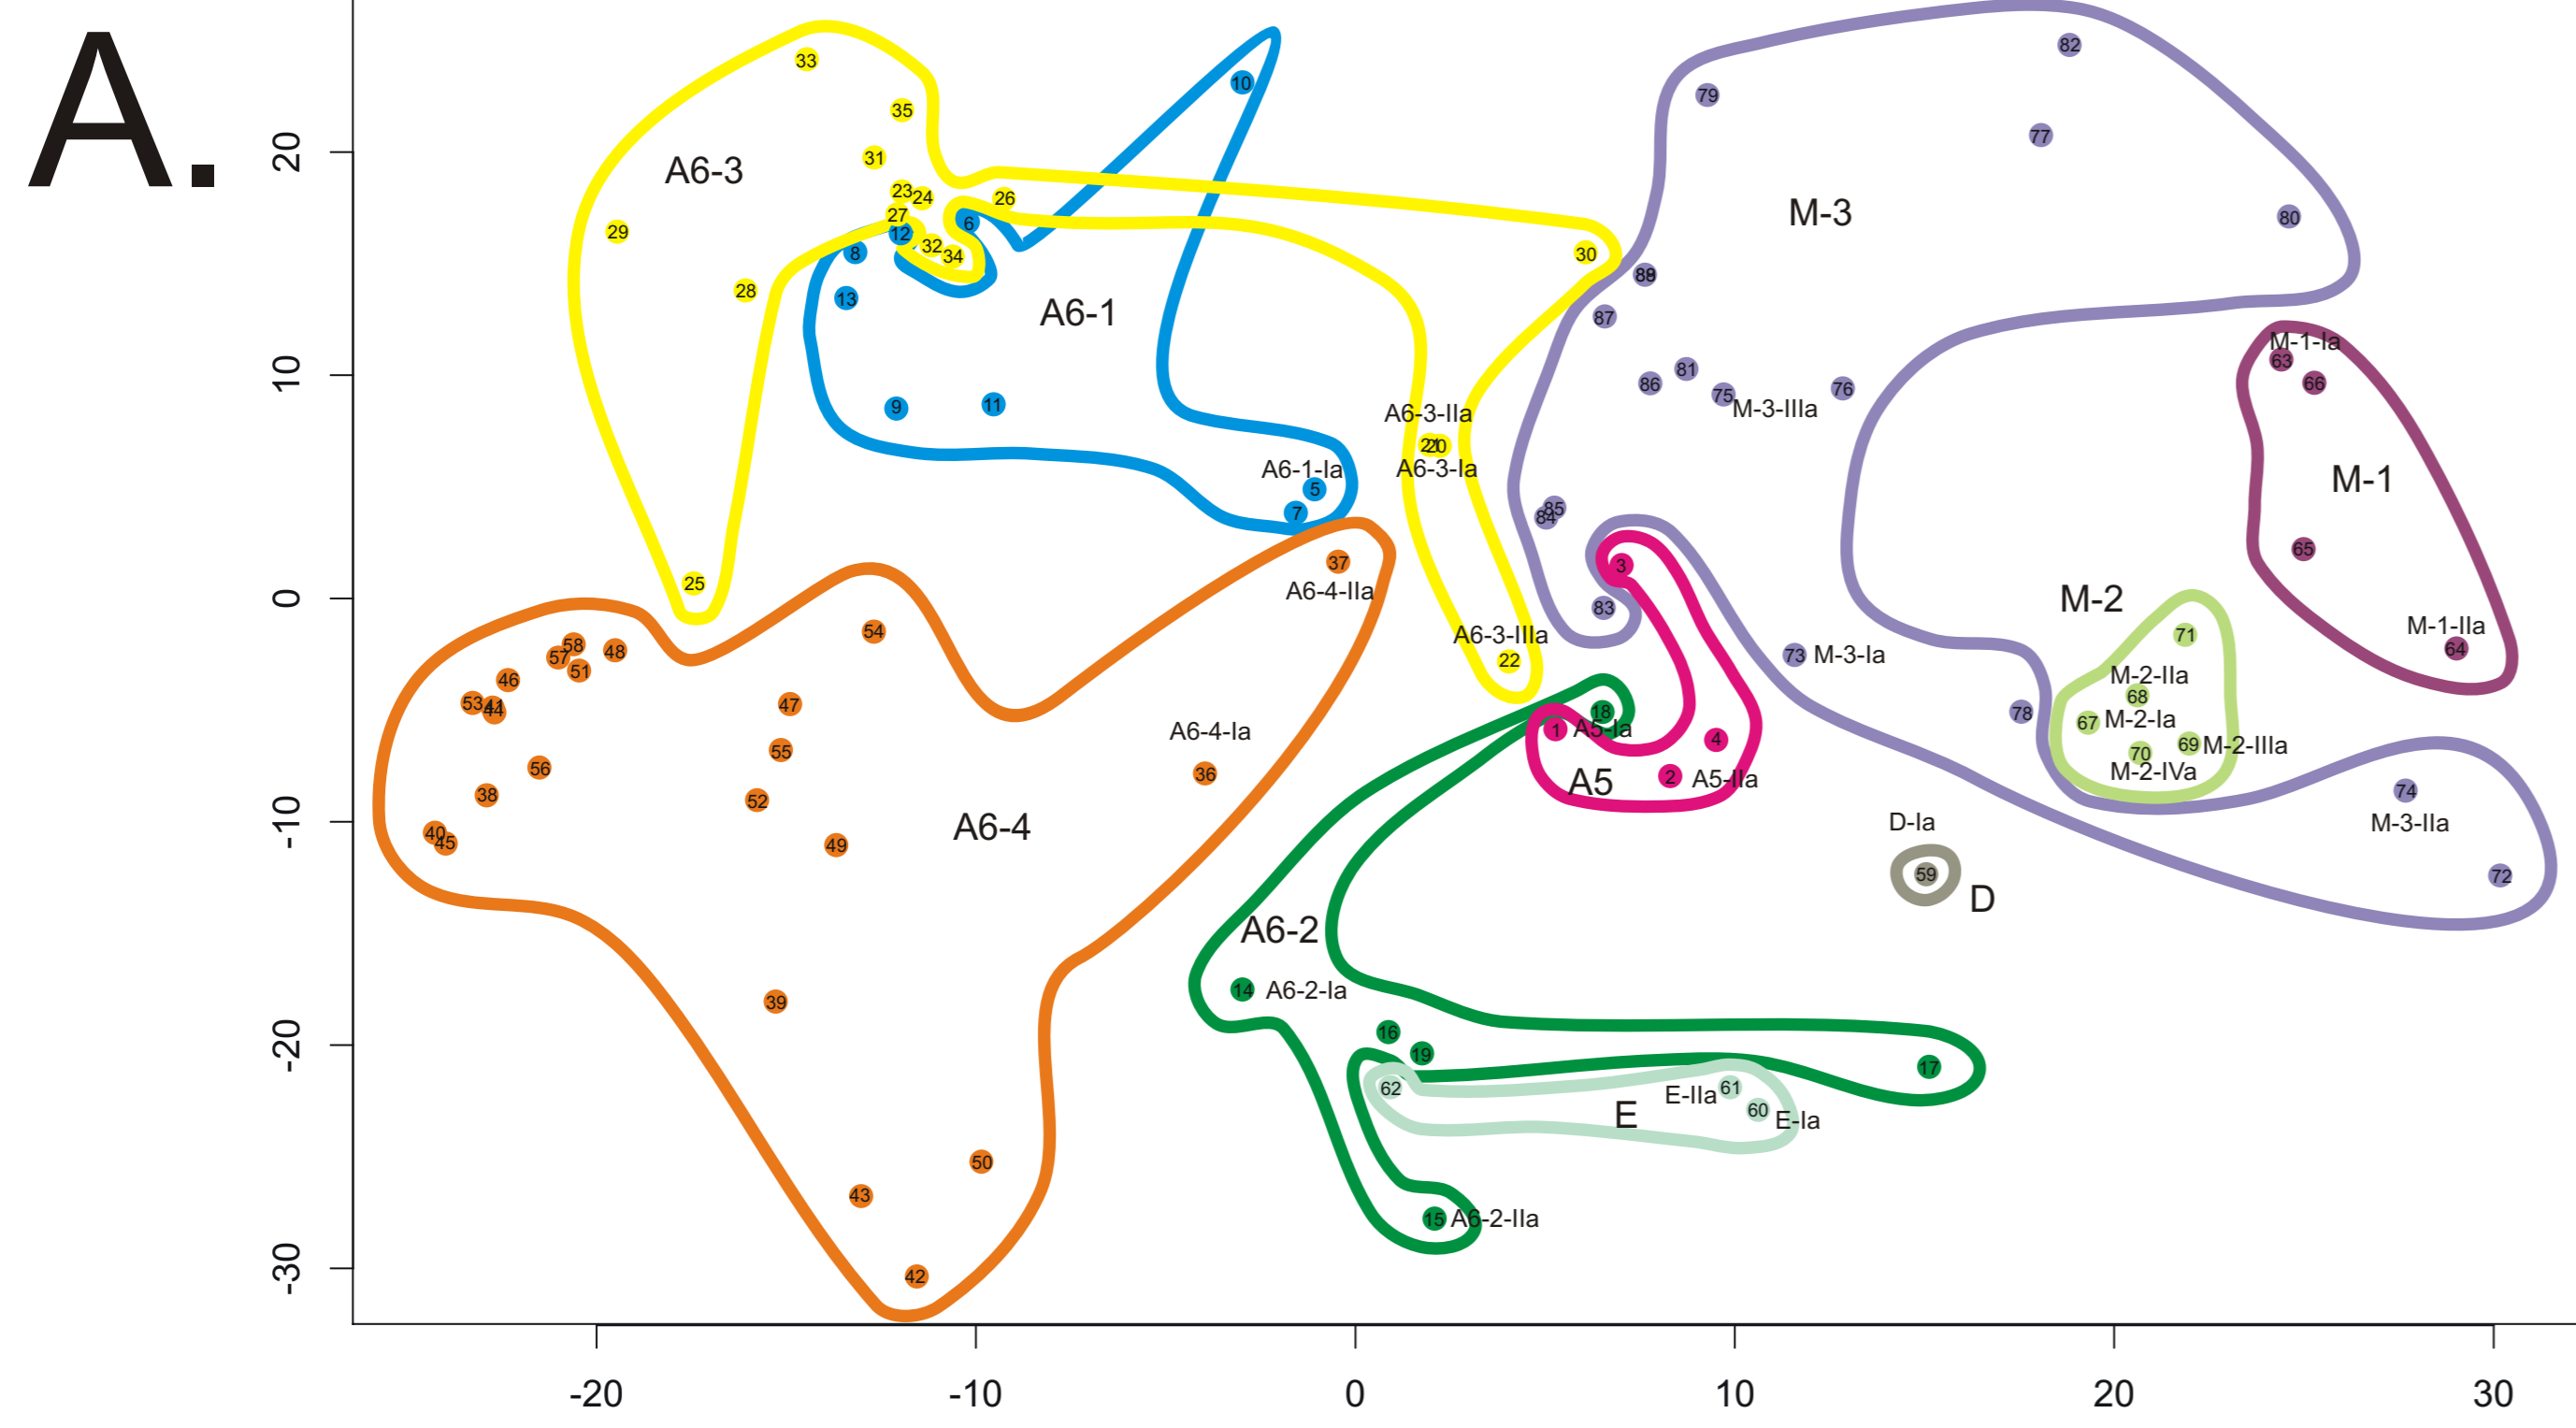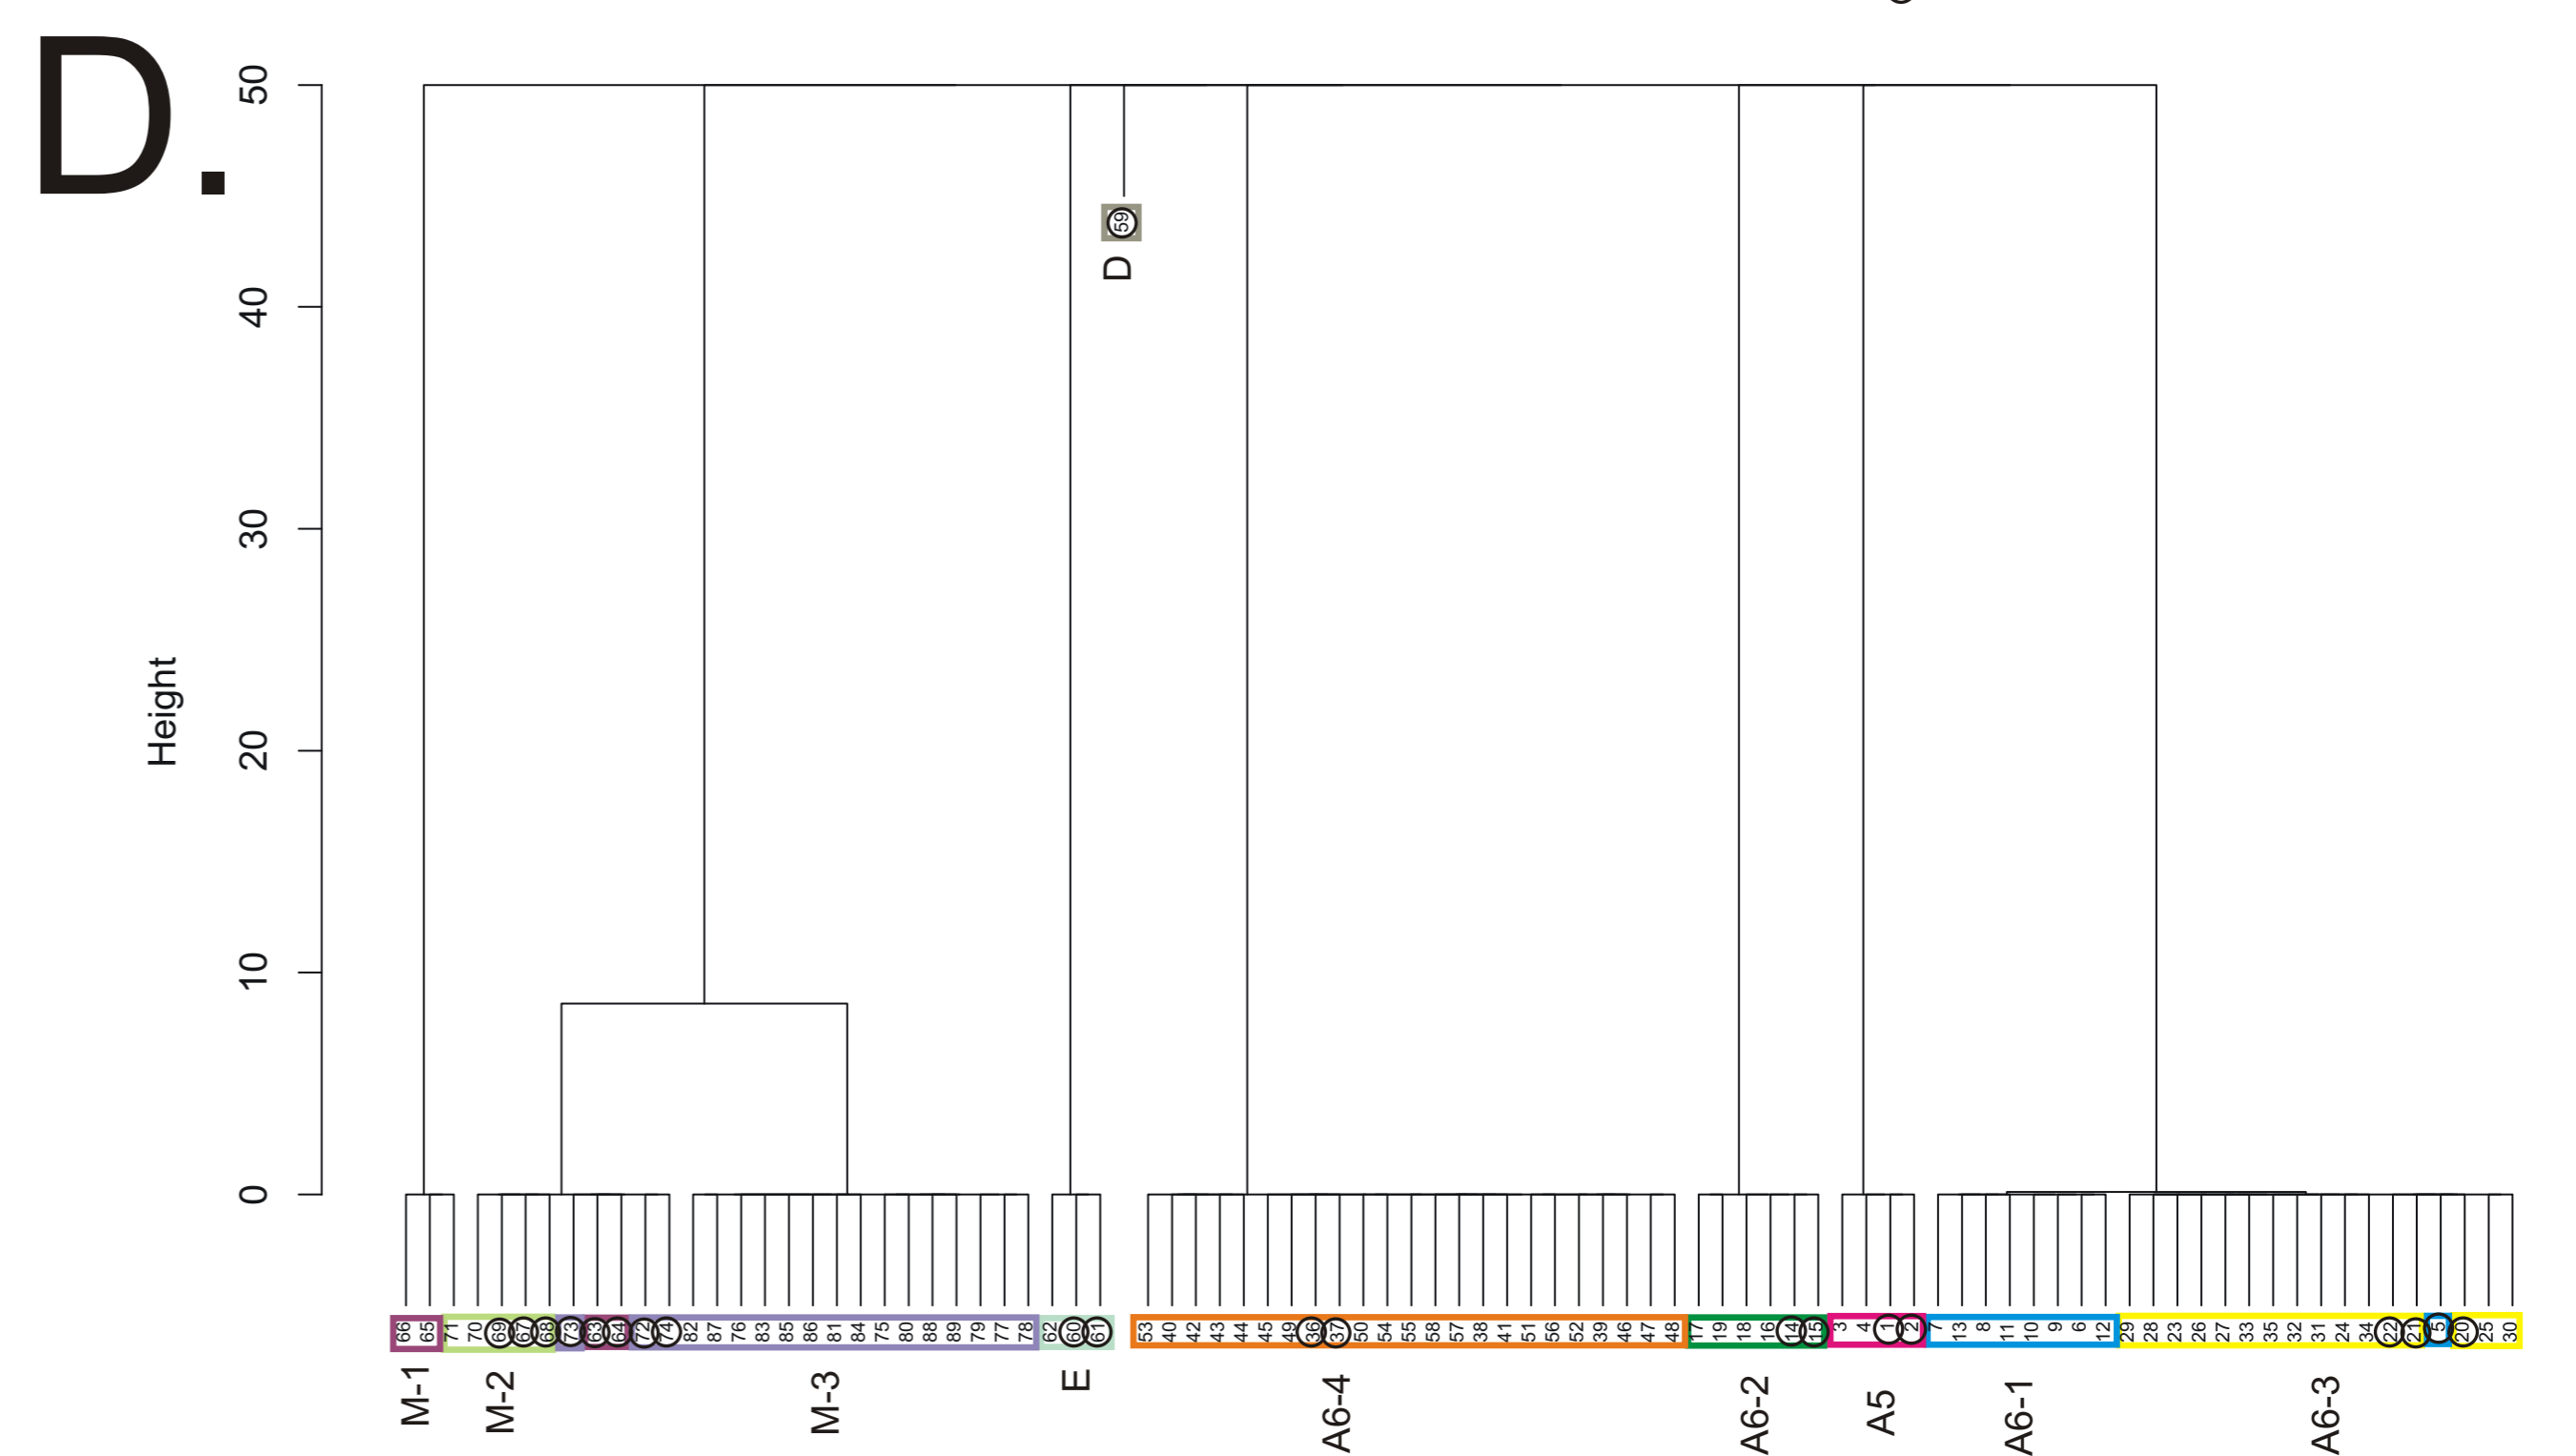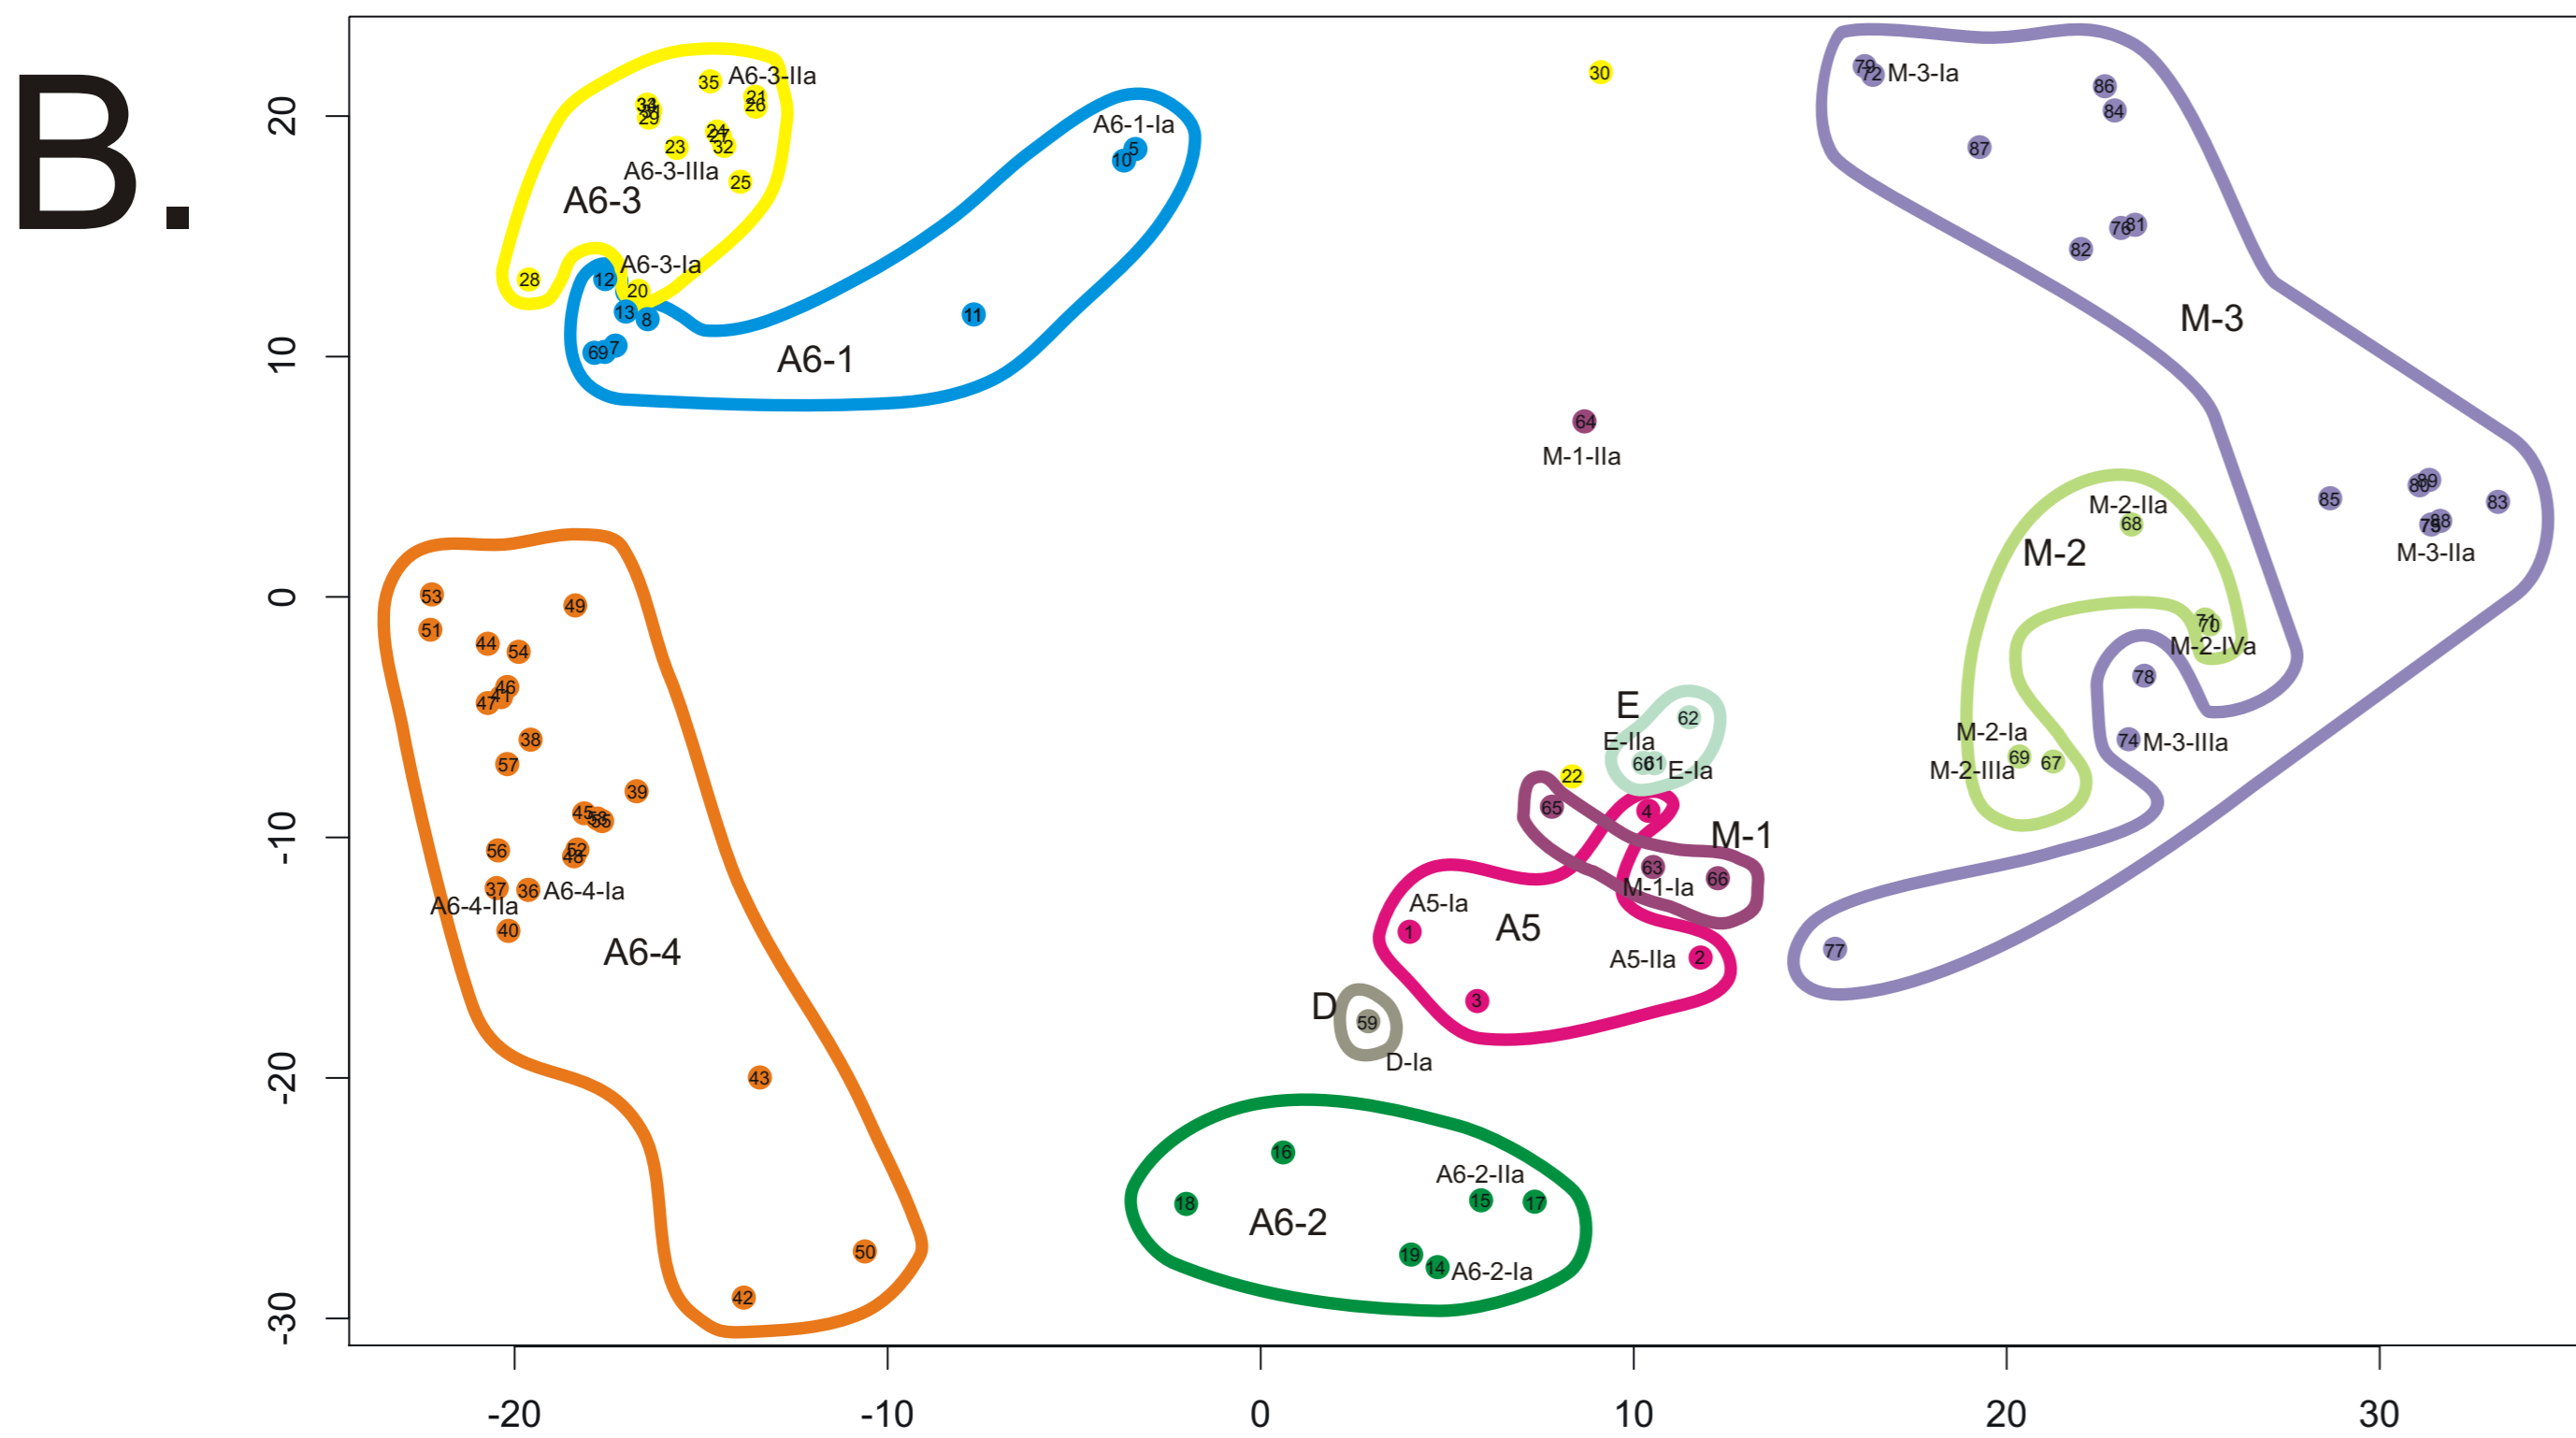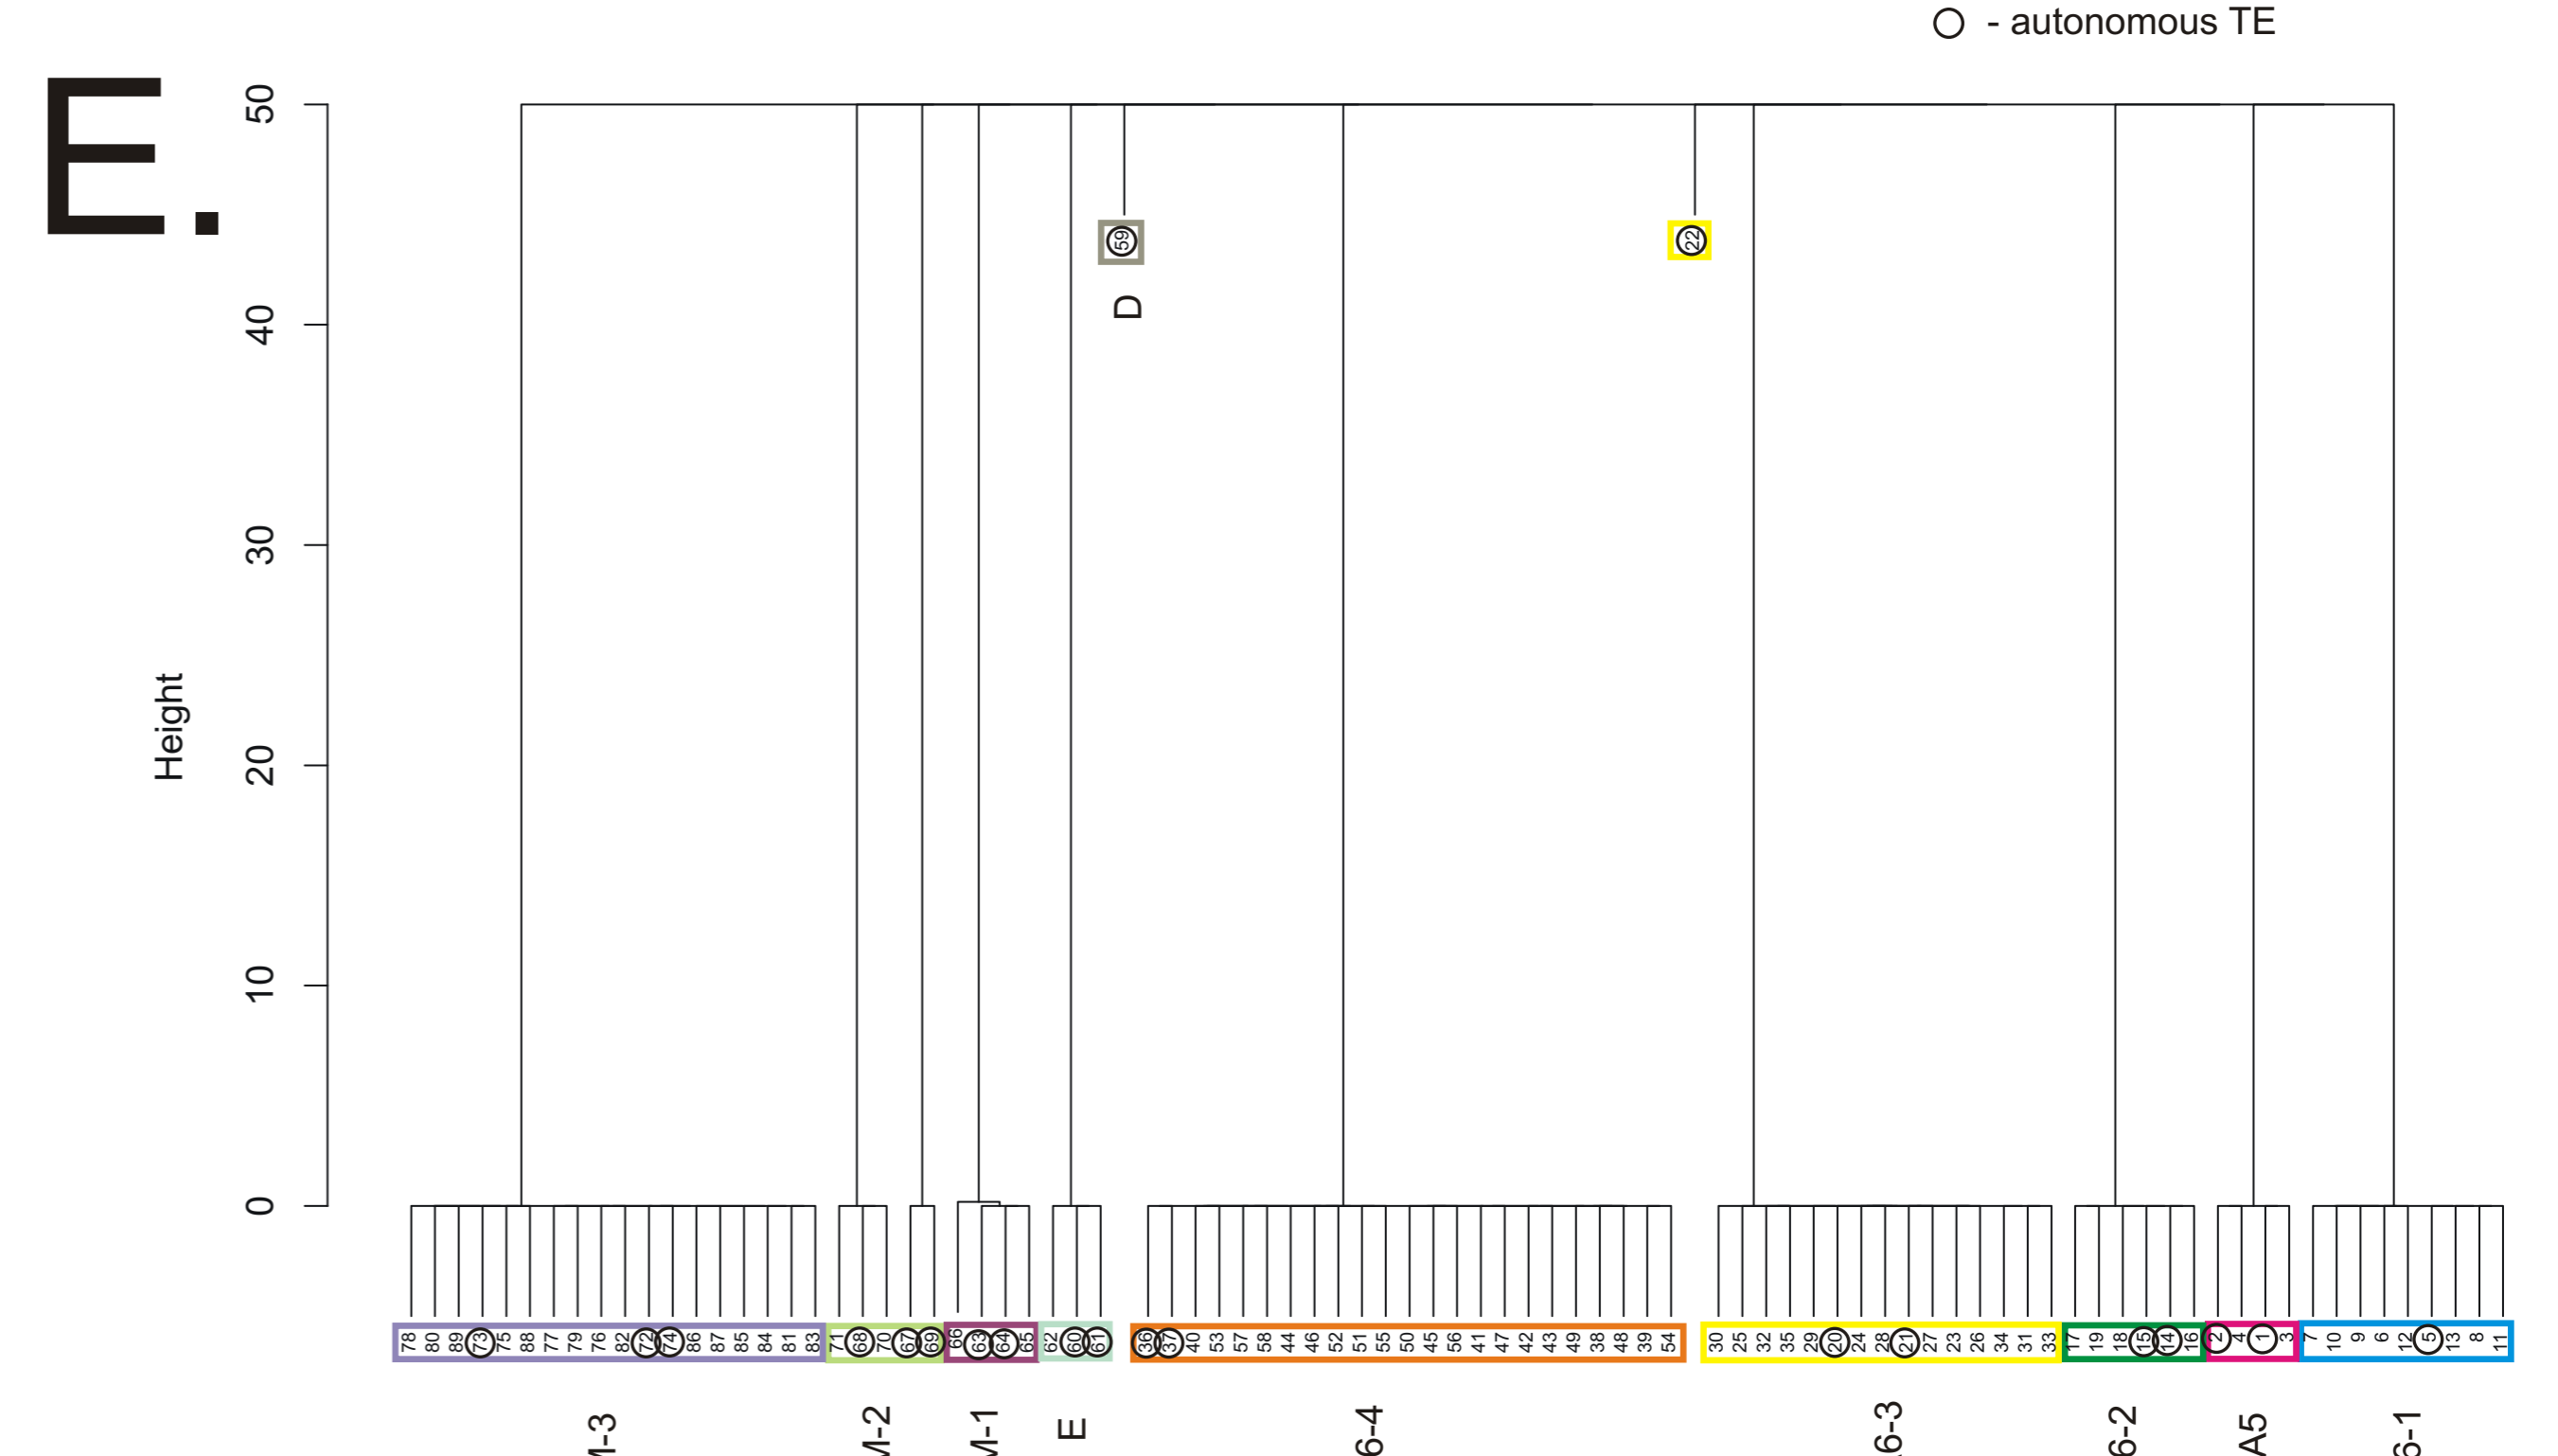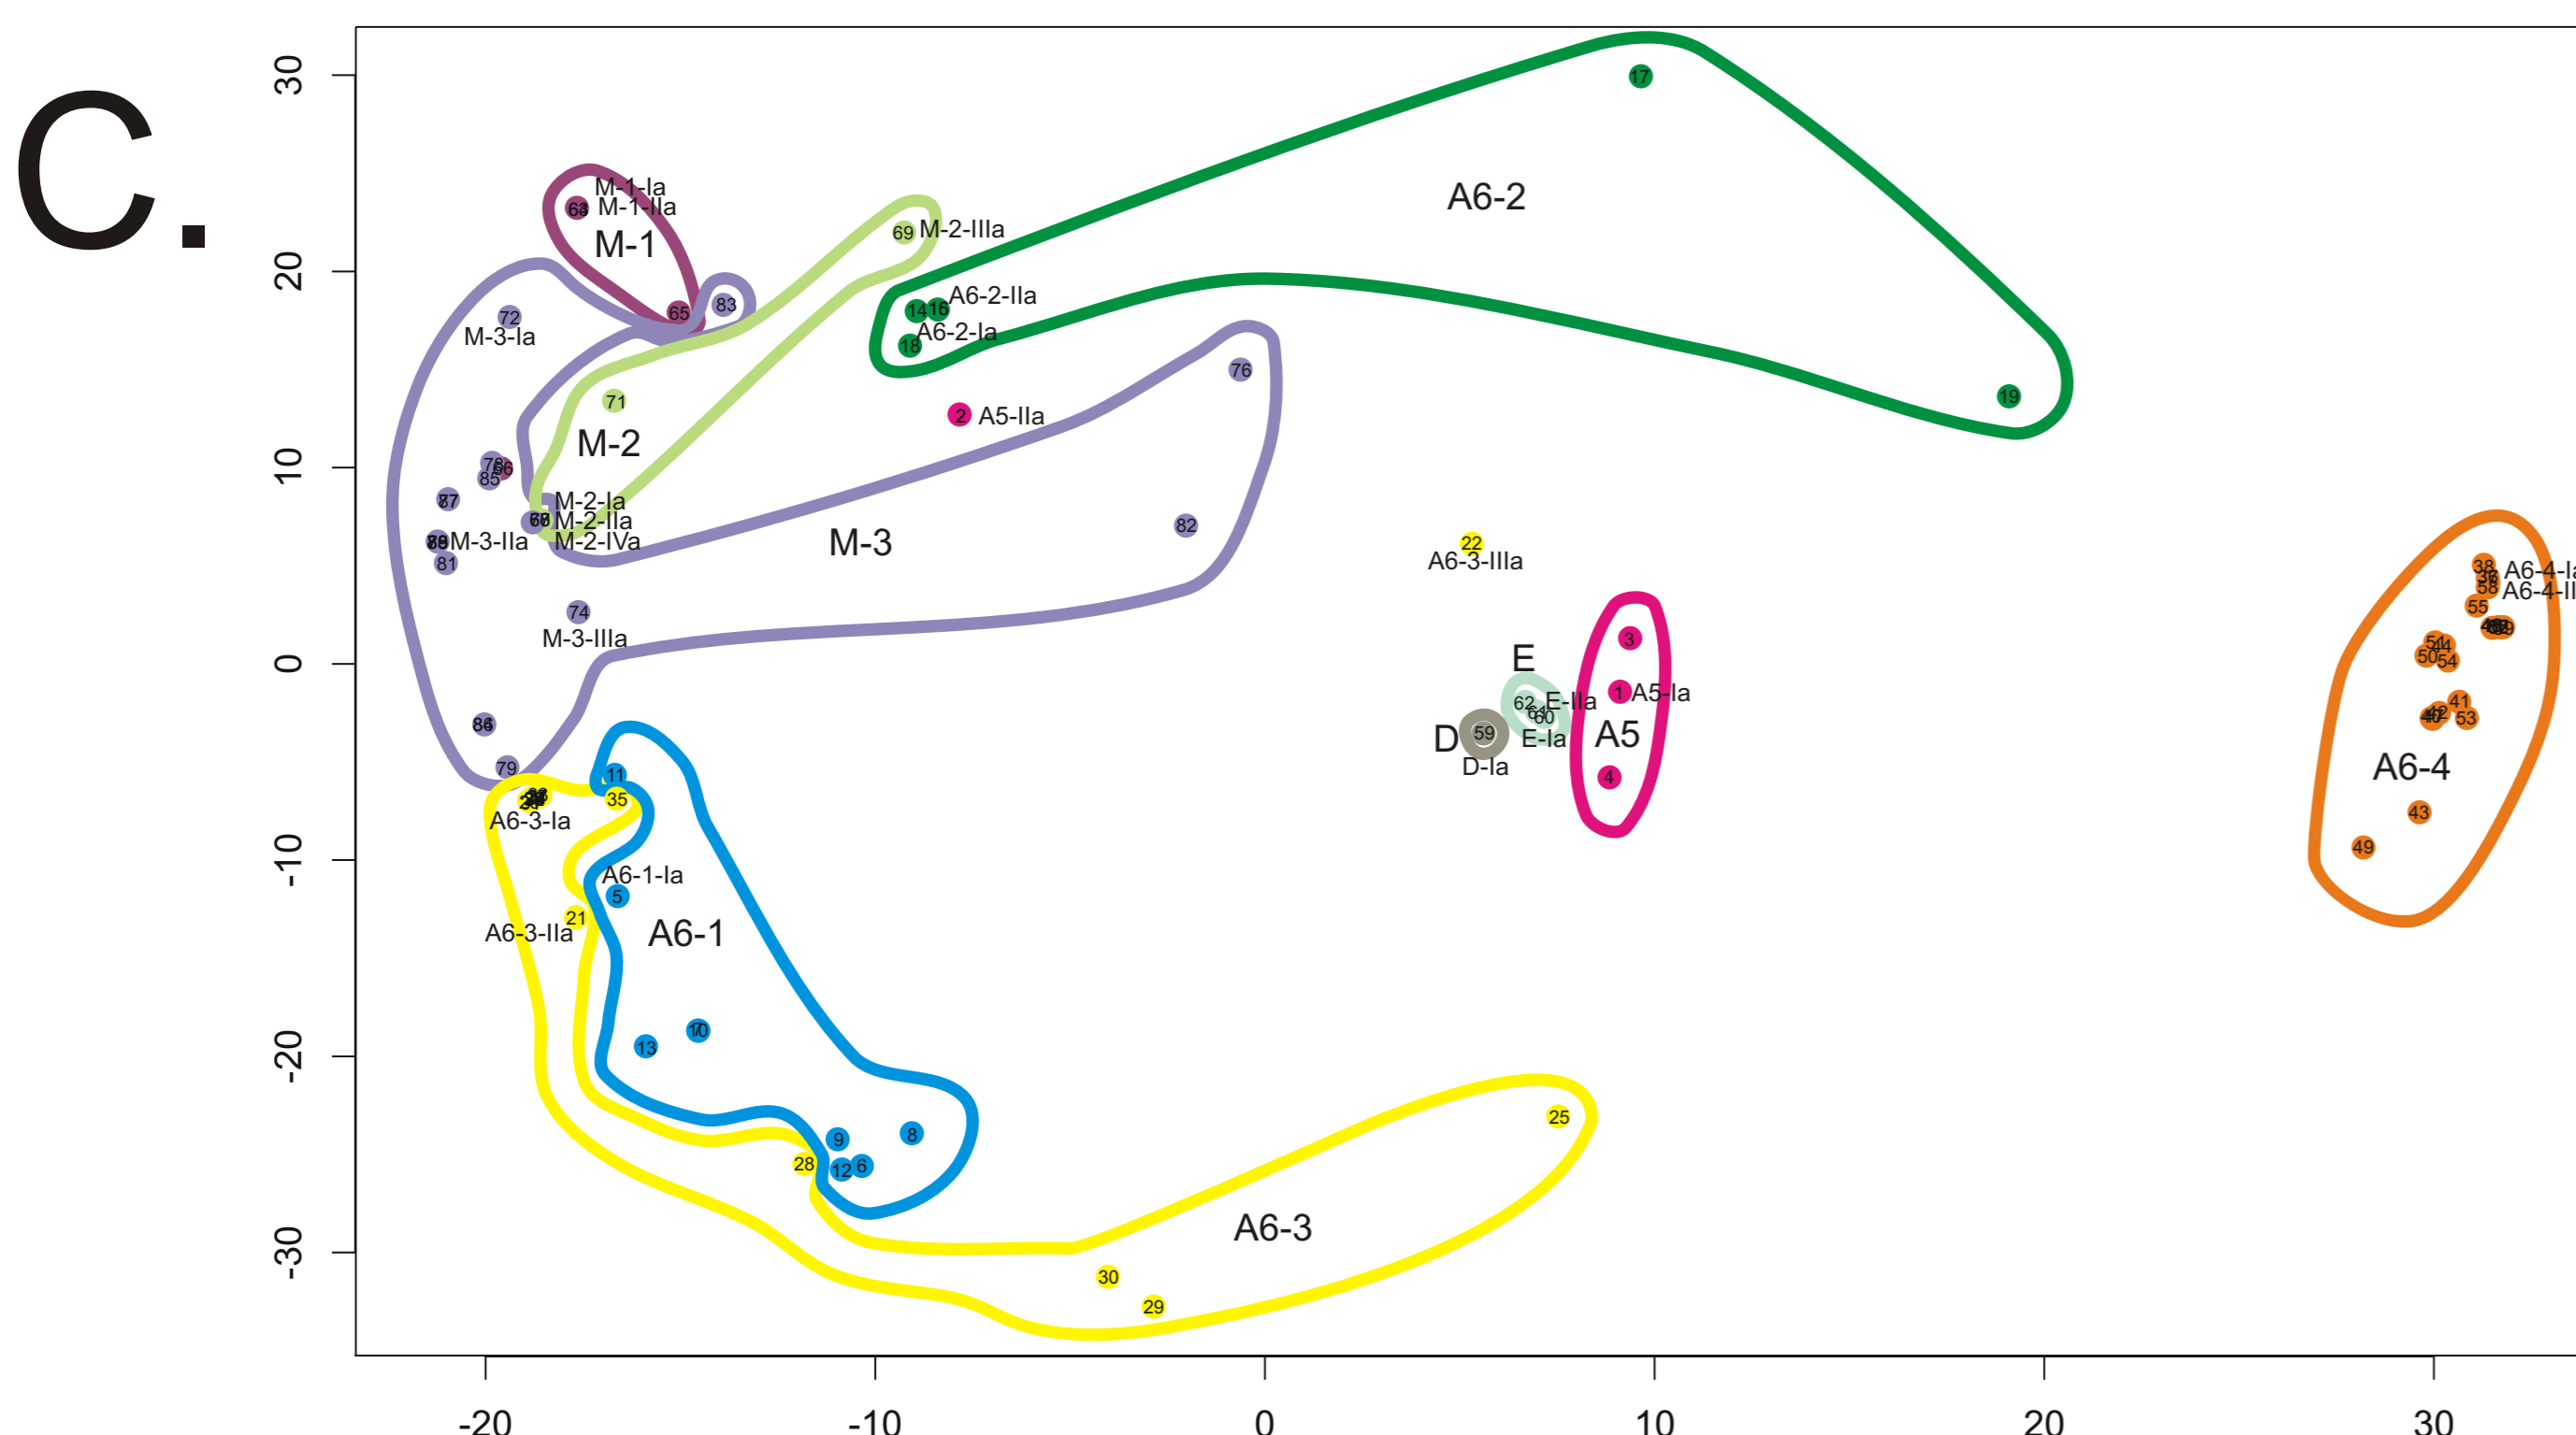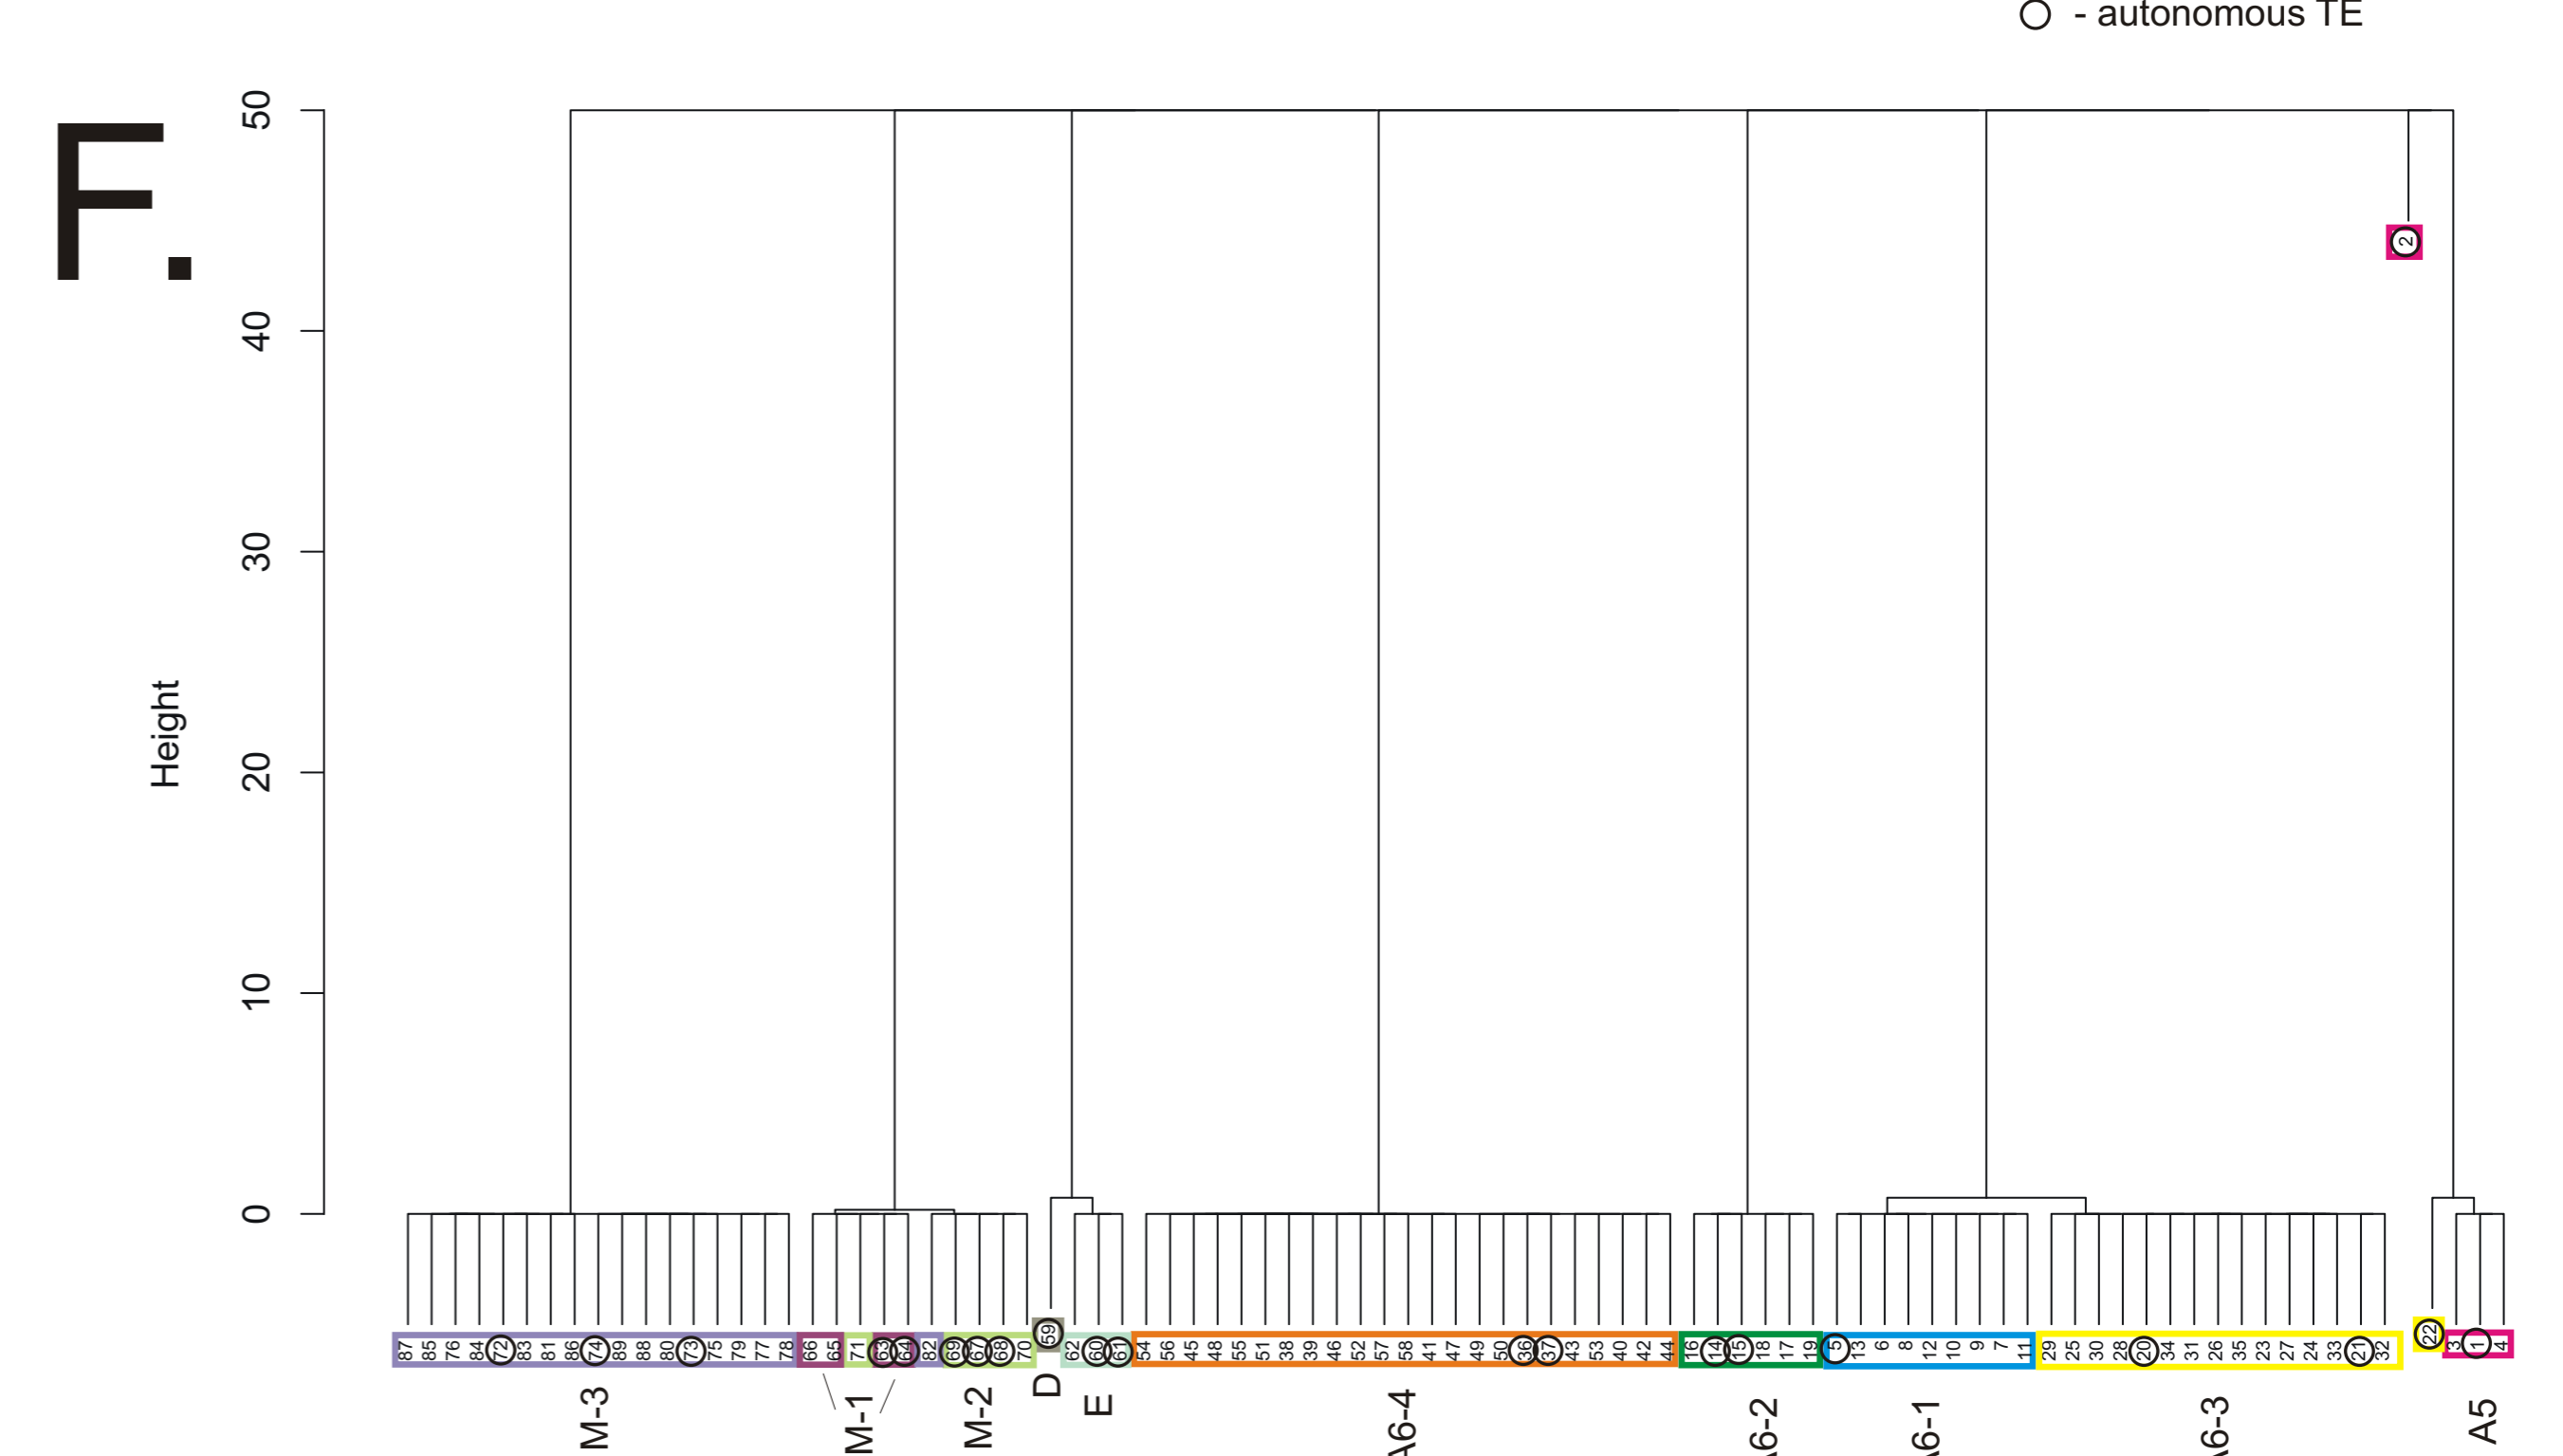

Supplement: Additional file 2 [file 1471-2164-8-409-s2.pdf]
